# Supplementary material
Source: PubMed Central journal article supplement (PMC5886750)
Supplement: NIHMS942122-supplement.pdf [file NIHMS942122-supplement.pdf]

Figure S1. Related to Figure 1

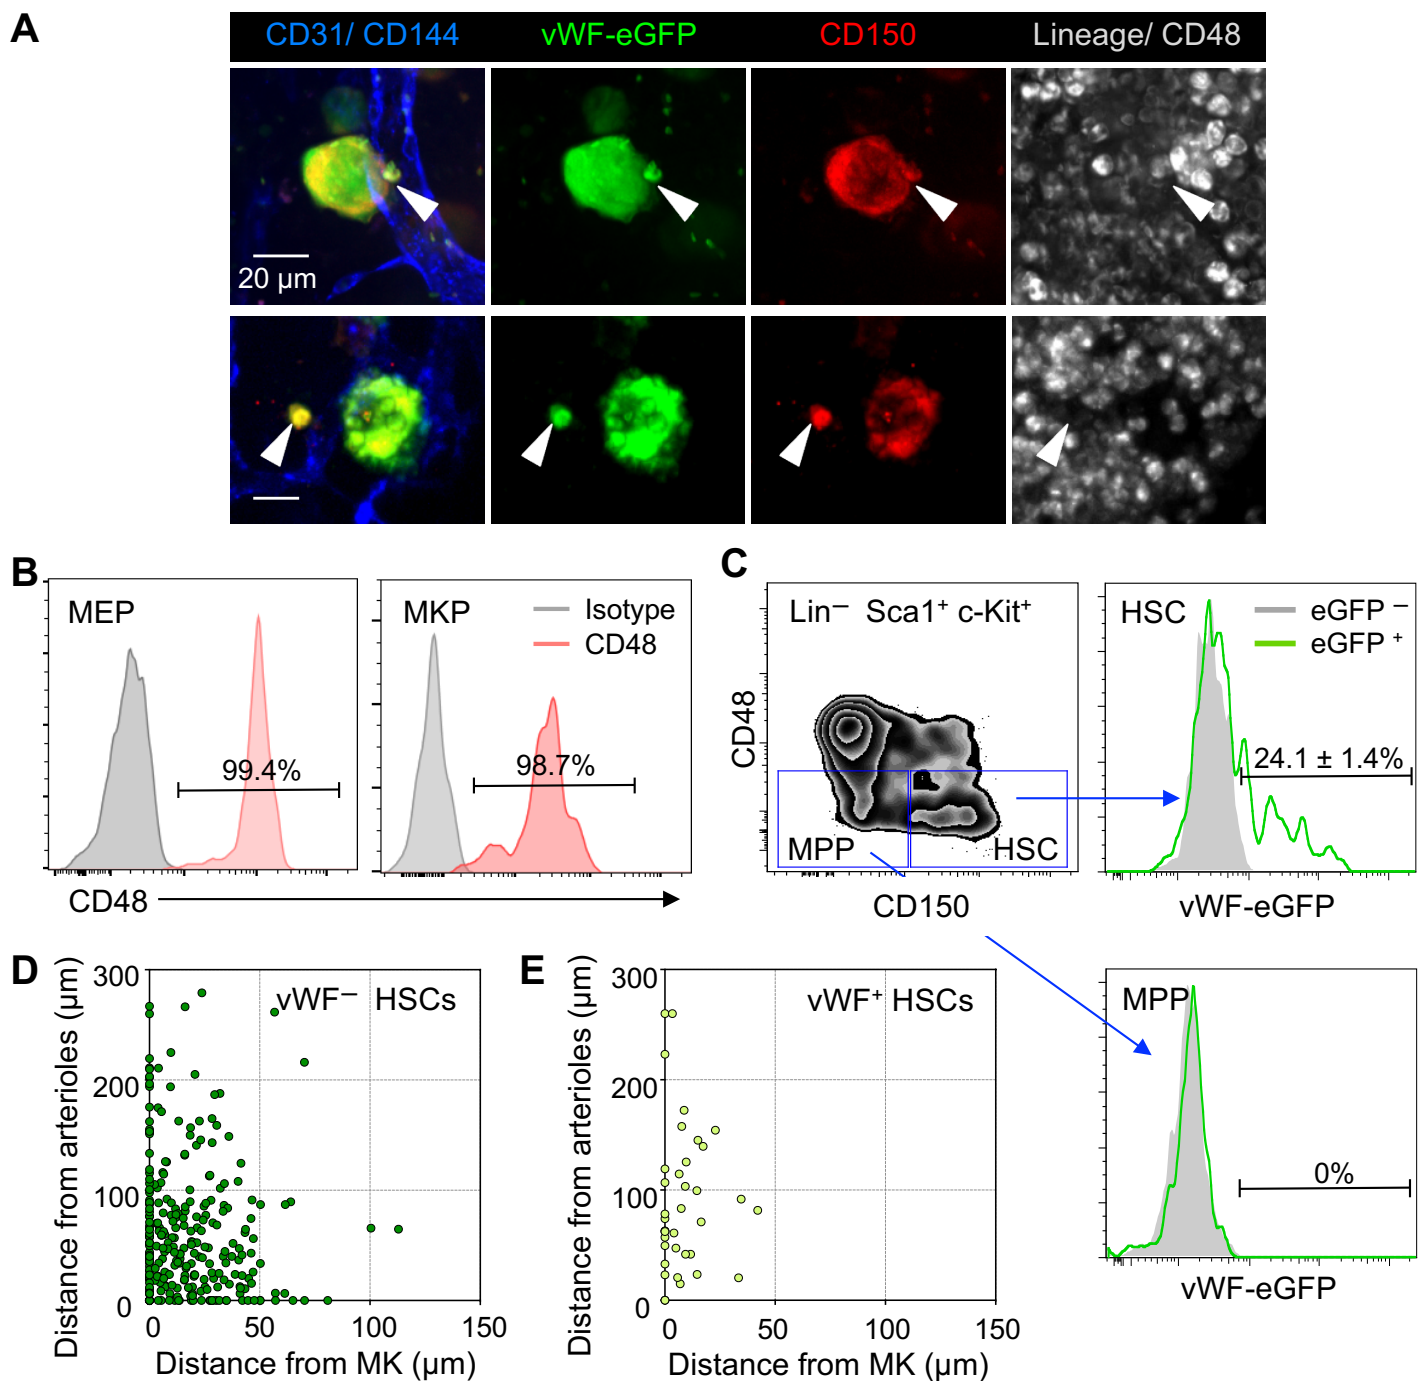

**Figure S1, related to Figure 1.  $vWF$ -eGFP<sup>+</sup> cells constitute a small fraction of the LSK CD48<sup>-</sup> CD150<sup>+</sup> HSC population in the mouse BM**

(A) Representative whole-mount images of  $vWF$ -eGFP<sup>+</sup> HSCs in the mouse sternal BM. White arrowheads denote phenotypic Lineage (Lin)<sup>-</sup> CD48<sup>-</sup> CD150<sup>+</sup>  $vWF$ -eGFP<sup>+</sup> HSCs. MK are distinguished by their size, morphology and CD150 and  $vWF$  expression. Vascular endothelial cells are stained intravenously with antibodies to CD31 and CD144. (B) Bone marrow FACS analysis of CD48 expression in MK/erythroid progenitors (MEP; Lin<sup>-</sup> Sca1<sup>-</sup> c-Kit<sup>+</sup> FcR2/3<sup>-</sup> CD34<sup>-</sup>) and MK progenitors (MKP; Lin<sup>-</sup> Sca1<sup>-</sup> c-Kit<sup>+</sup> CD150<sup>+</sup> CD41<sup>+</sup>) (C) FACS gating strategy for the isolation of phenotypic Lin<sup>-</sup> Sca1<sup>+</sup> c-Kit<sup>+</sup> CD48<sup>-</sup> CD150<sup>+</sup>  $vWF$ -eGFP<sup>+</sup> HSCs from the BM of *Vwf-eGFP* mice. (D) 2D distribution of the distances between  $vWF$ -eGFP<sup>-</sup> (D) and  $vWF$ -eGFP<sup>+</sup> HSCs (E) and MK or arterioles in the mouse sternal BM.  $n = 282$   $vWF$ <sup>-</sup> HSCs and  $n = 37$   $vWF$ <sup>+</sup> HSCs (related to Figure 1C and 1D).

Figure S2. Related to Figure 2

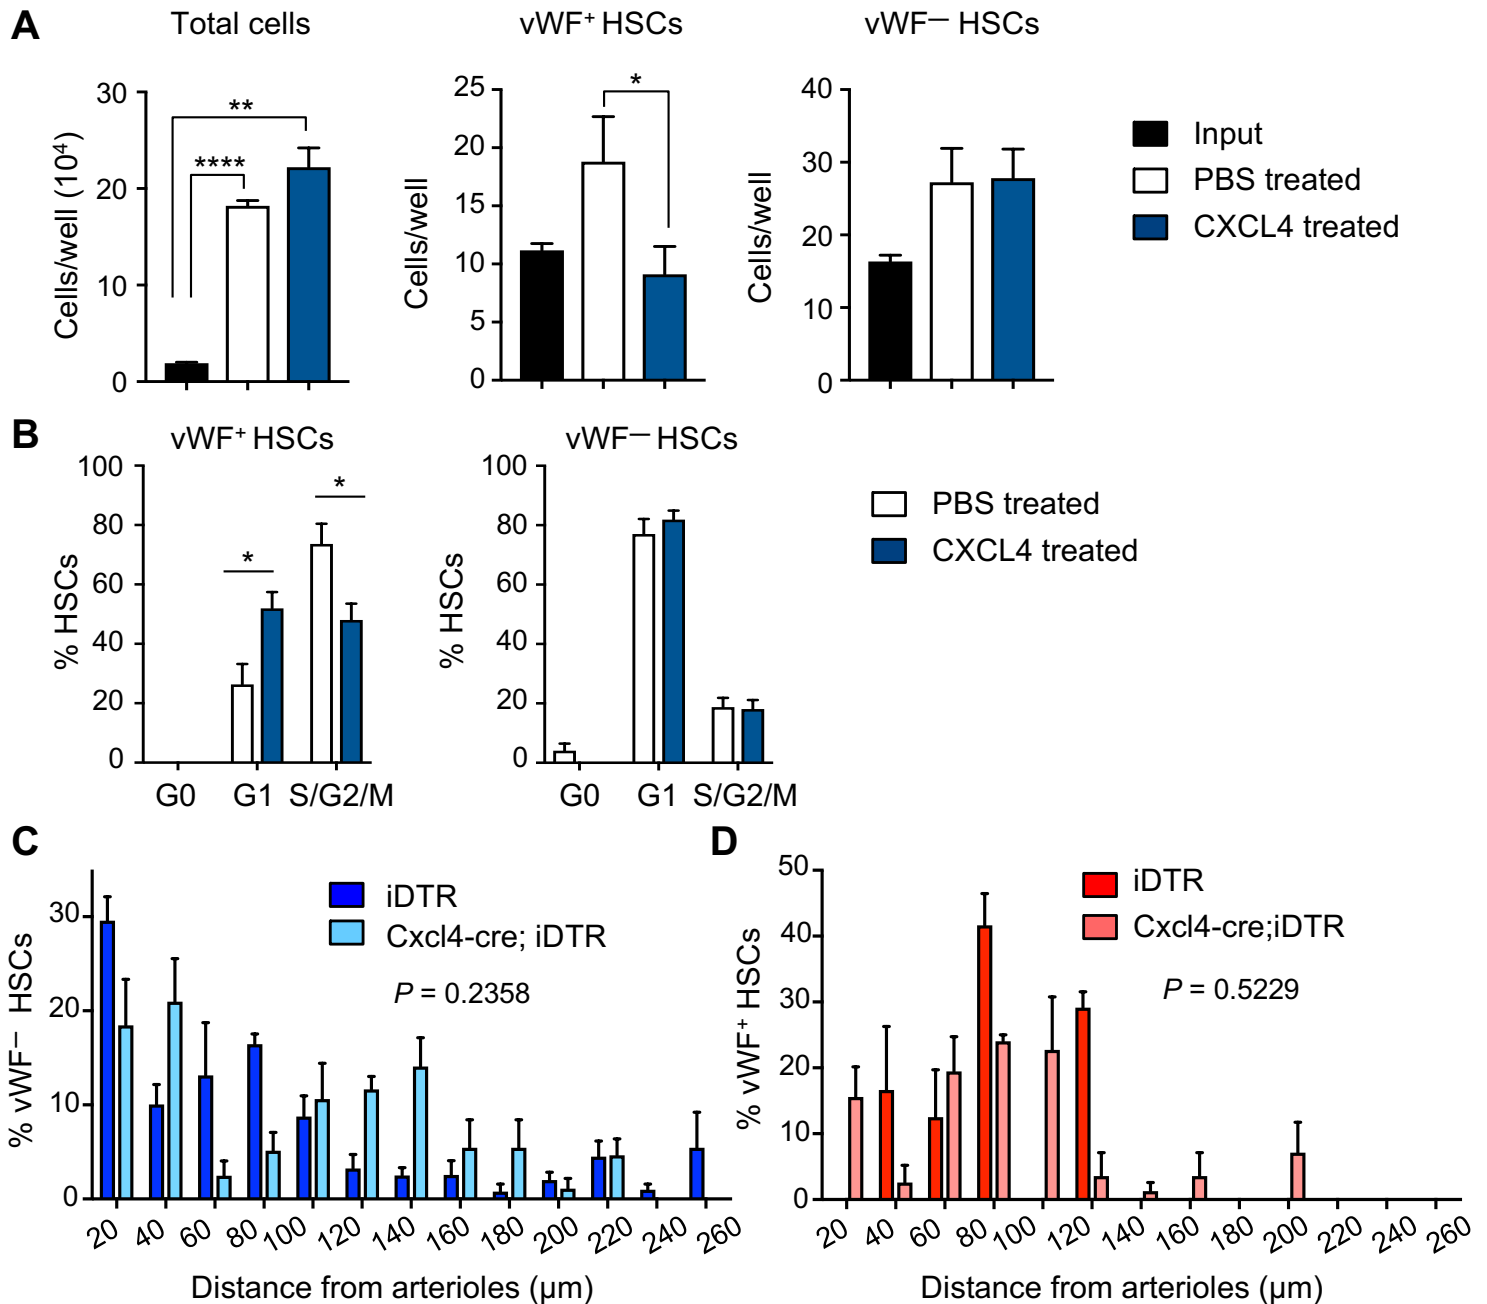

**Figure S2, related to Figure 2. Distribution of lineage-biased HSCs in the mouse BM after MK depletion**

(A) Absolute number of cells per well in cultures of Lineage (Lin)<sup>-</sup> cells isolated from *Vwf-eGFP* mice and cultured *in vitro* during 4 days in the presence or absence of recombinant CXCL4. Input indicates the number of cells on day 0.  $n = 10$  wells per group (B) Cell cycle analysis by FACS using anti-Ki-67 and Hoechst 33342 staining of vWF<sup>-</sup> and vWF<sup>+</sup> HSCs *in vitro* cultured in the presence or absence of CXCL4.  $n = 8$  (PBS) and  $n = 5$  (CXCL4) wells per group. \* $P < 0.05$ , \*\* $P < 0.01$ , \*\*\*\* $P < 0.0001$ . Error bars S.E.M.. Unpaired Student's *t* tests. Localization of phenotypic Lin<sup>-</sup> CD48<sup>-</sup> CD150<sup>+</sup> vWF-eGFP<sup>-</sup> (C) and vWF-eGFP<sup>+</sup> (D) HSCs in the mouse BM relative to arterioles in control (*iDTR*; *Vwf-eGFP*) and *Cxcl4-cre*; *iDTR*; *Vwf-eGFP* mice, 7 days after DT treatment.  $n = 142$  vWF<sup>-</sup> and  $n = 14$  vWF<sup>+</sup> HSCs from control *iDTR*; *Vwf-eGFP*;  $n = 83$  vWF<sup>-</sup> and  $n = 35$  vWF<sup>+</sup> HSCs from *Cxcl4-cre*; *iDTR*; *Vwf-eGFP*.  $P$  values were determined by two-sample KS test. Error bars S.E.M.

Figure S3. Related to Figure 2

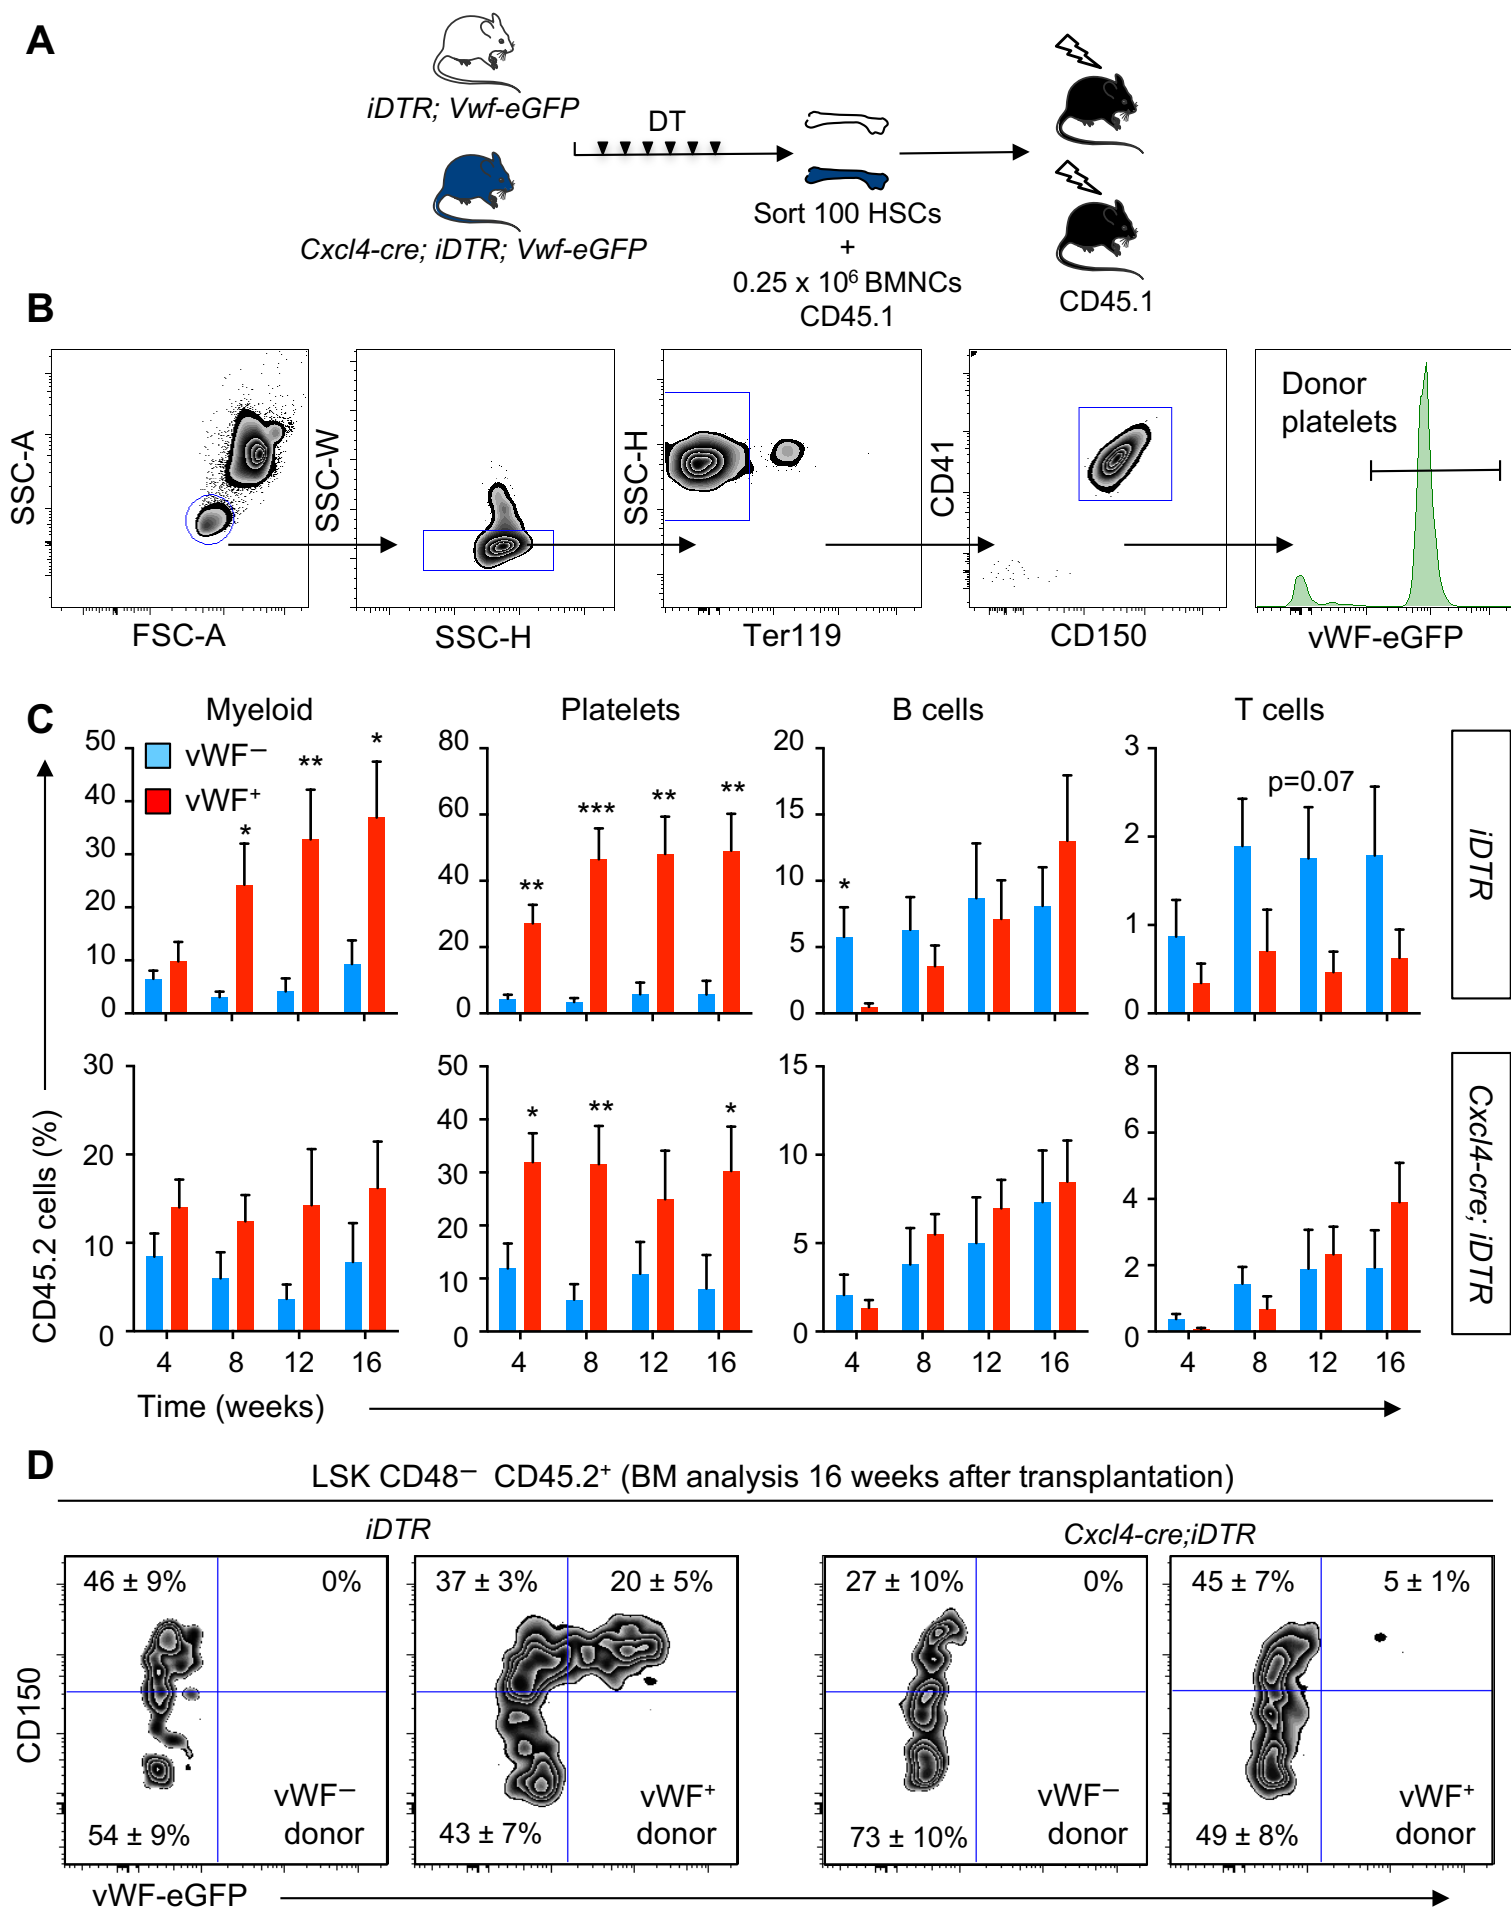

**Figure S3, related to Figure 2. Reconstitution potential of lineage-biased HSCs after MK depletion**

(A) Experimental design of the competitive reconstitution assays used to determine the effect of MK depletion in the lineage potential of purified vWF<sup>-</sup> and vWF<sup>+</sup> HSCs. (B) Gating strategy for peripheral blood platelet reconstitution analysis in mice 16 weeks after competitive transplantation of CD45.2 vWF<sup>+</sup> HSCs. (C) Quantification of tri-lineage (myeloid, B cell and T cell) and platelet engraftment in the peripheral blood of mice analyzed in **Figure 2H-J**.  $n = 8$  (iDTR vWF<sup>-</sup> and vWF<sup>+</sup> groups);  $n = 9$  (Cxcl4-cre,iDTR vWF<sup>-</sup> group);  $n = 8$  (Cxcl4-cre,iDTR vWF<sup>+</sup> group). (D) Representative BM FACS plots showing donor HSCs contribution to recipient CD45.2<sup>+</sup> LSK CD48<sup>-</sup> CD150<sup>+</sup> vWF-eGFP<sup>-</sup> or vWF-eGFP<sup>+</sup> HSC compartment, at 16 weeks from the mice analyzed in **Figure 2H-J**. \* $P < 0.05$ , \*\* $P < 0.01$ . Error bars S.E.M. Unpaired Student's  $t$  tests (C).

Figure S4. Related to Figure 3

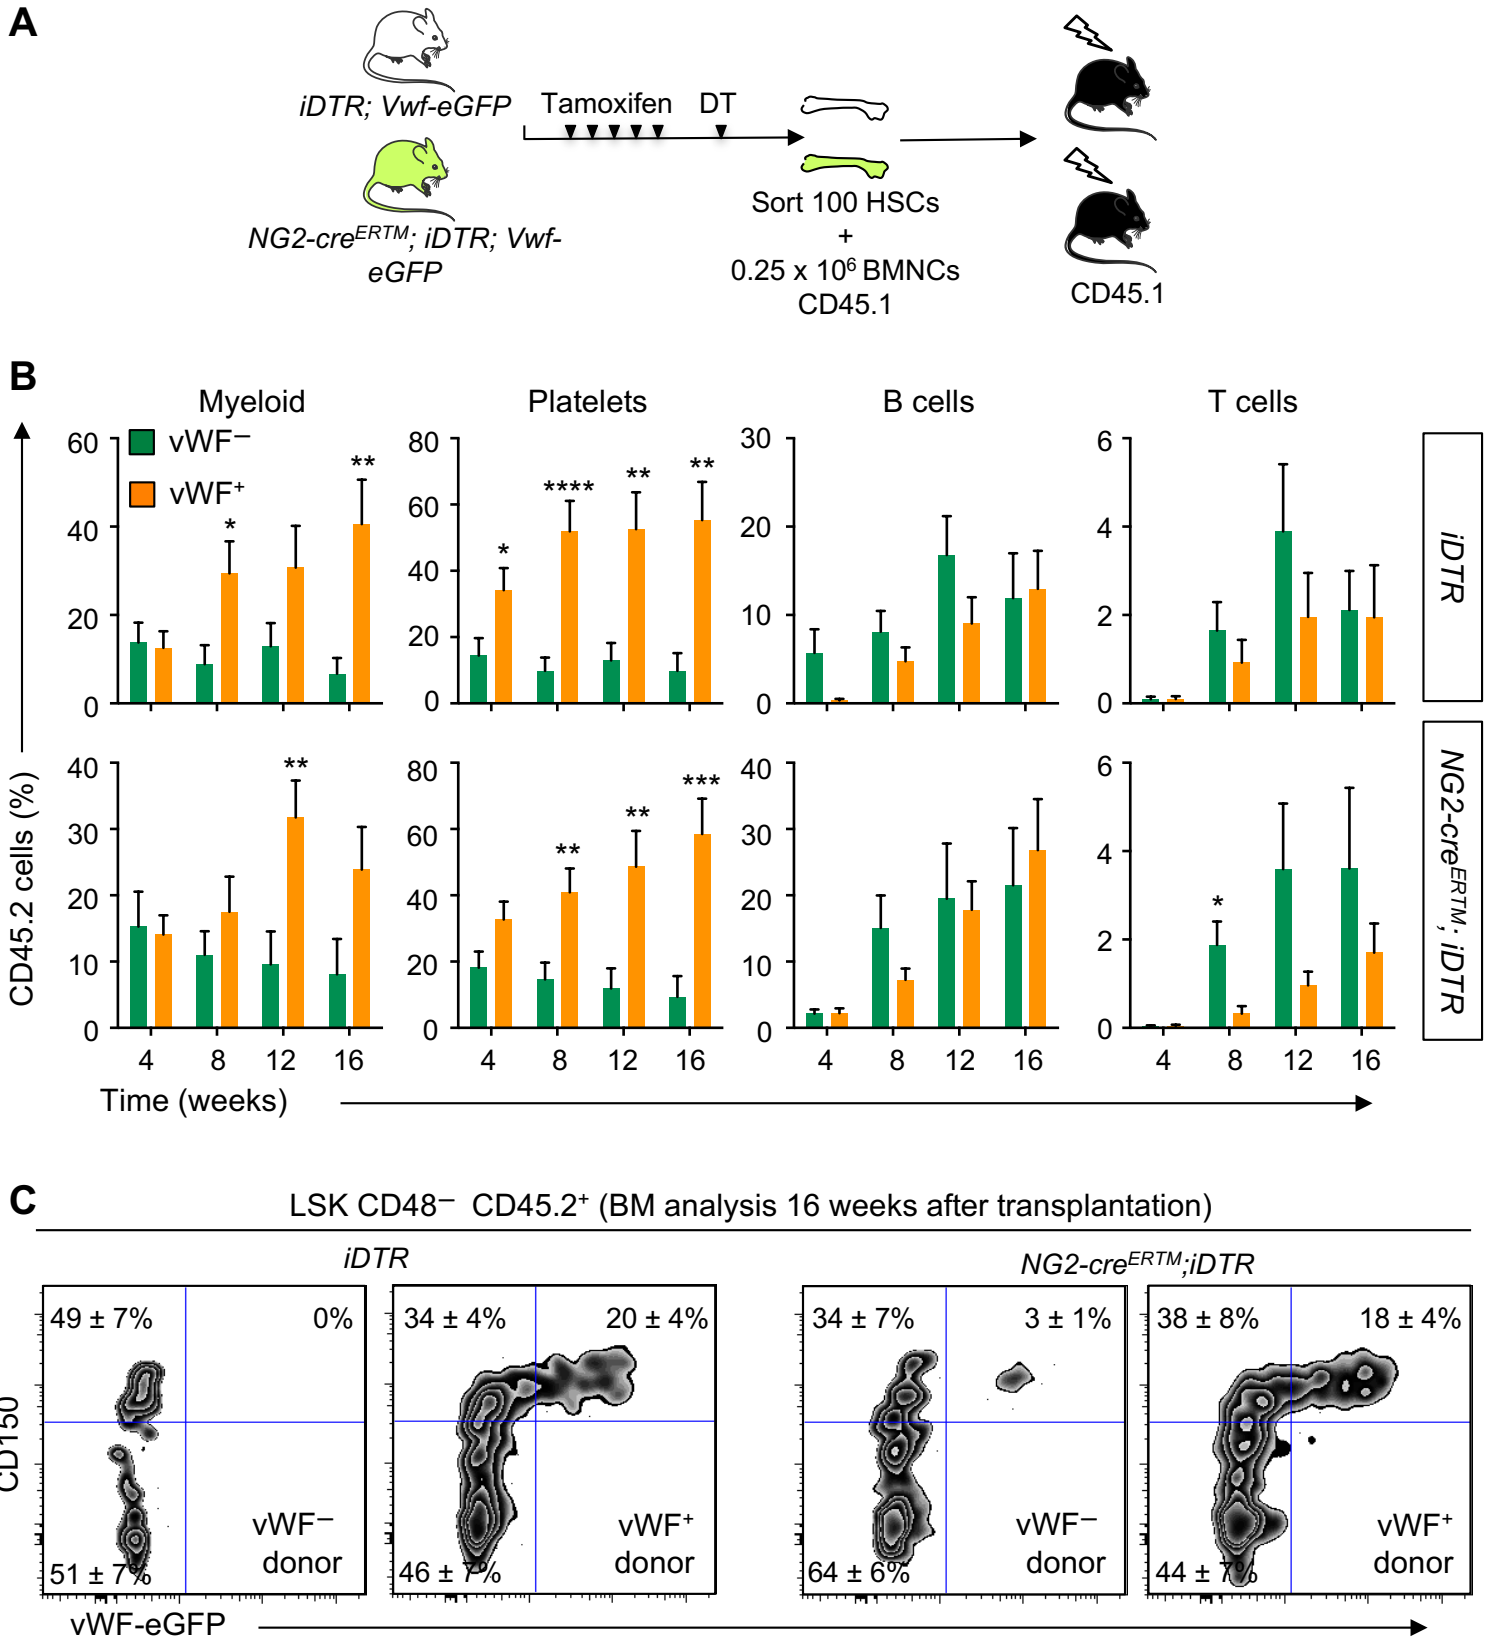

**Figure S4, related to Figure 3. Reconstitution potential of lineage-biased HSCs after NG2<sup>+</sup> cells depletion**

(A) Experimental design of the competitive reconstitution assays used to determine the effect of NG2<sup>+</sup> cells depletion in the lineage potential of purified vWF<sup>-</sup> and vWF<sup>+</sup> HSCs. (B) Quantification of tri-lineage (myeloid, B cell and T cell) and platelet engraftment in the peripheral blood of mice analyzed in **Figure 3F-H**.  $n = 8$  (*iDTR* groups) and  $n = 9$  (*NG2-cre<sup>ERTM</sup>;iDTR* groups). (C) Representative BM FACS plots showing donor HSCs contribution to recipient CD45.2<sup>+</sup> LSK CD48<sup>-</sup> CD150<sup>+</sup> vWF-eGFP<sup>-</sup> or vWF-eGFP<sup>+</sup> HSC compartment at 16 weeks from the mice analyzed in **Figure 3F-H**. \*P < 0.05, \*\*\*P < 0.001. Error bars S.E.M. Unpaired Student's *t* tests (B).
